# Supplementary material for: A network-based meta-analysis for characterizing the genetic landscape of human aging
Source: PubMed Central journal article supplement (PMC5765210; doi:10.1007/s10522-017-9741-5), 2017-12-21

Set overlaps based on shared Entrez gene identifiers.

|                           |      |      |      |      |      |    |     |     |     |     |     |     |    |     |     |    |    |     |     |     |    |    |    |    |     |      |     |    |     |    |     |     |      |     |     |     |     |     |     |     |   |
|---------------------------|------|------|------|------|------|----|-----|-----|-----|-----|-----|-----|----|-----|-----|----|----|-----|-----|-----|----|----|----|----|-----|------|-----|----|-----|----|-----|-----|------|-----|-----|-----|-----|-----|-----|-----|---|
| ME_Xu (679)               | 679  | 42   | 73   | 80   | 679  | 5  | 5   | 7   | 13  | 8   | 3   | 11  | 3  | 15  | 30  | 4  | 1  | 5   | 20  | 10  | 1  | 4  | 1  | 4  | 21  | 53   | 4   | 14 | 185 | 54 | 21  | 16  | 79   | 70  | 18  | 66  | 31  | 228 | 72  | 679 |   |
| ME>Weidner (105)          | 105  | 5    | 7    | 13   | 105  | 1  | 0   | 2   | 1   | 0   | 1   | 2   | 0  | 1   | 5   | 0  | 0  | 0   | 2   | 1   | 0  | 0  | 0  | 1  | 2   | 10   | 0   | 7  | 27  | 19 | 9   | 8   | 16   | 23  | 4   | 9   | 5   | 62  | 105 | 72  |   |
| ME_Teschendorff (591)     | 591  | 37   | 50   | 90   | 591  | 3  | 4   | 5   | 10  | 7   | 4   | 11  | 2  | 13  | 23  | 2  | 3  | 3   | 14  | 7   | 1  | 4  | 1  | 2  | 21  | 67   | 5   | 14 | 90  | 41 | 21  | 14  | 65   | 58  | 21  | 31  | 18  | 591 | 62  | 228 |   |
| ME_Steegenga (436)        | 436  | 30   | 31   | 57   | 436  | 0  | 6   | 3   | 3   | 4   | 5   | 12  | 2  | 6   | 14  | 2  | 0  | 1   | 9   | 3   | 1  | 1  | 1  | 2  | 7   | 43   | 7   | 1  | 18  | 2  | 4   | 4   | 69   | 5   | 21  | 5   | 436 | 18  | 5   | 31  |   |
| ME_Rakyan (138)           | 138  | 9    | 19   | 9    | 138  | 1  | 0   | 2   | 3   | 3   | 1   | 5   | 0  | 4   | 8   | 3  | 0  | 0   | 9   | 2   | 1  | 0  | 0  | 0  | 4   | 5    | 0   | 4  | 73  | 14 | 5   | 2   | 11   | 13  | 4   | 138 | 5   | 31  | 9   | 66  |   |
| ME_Marttila (239)         | 239  | 17   | 18   | 96   | 239  | 0  | 1   | 1   | 2   | 7   | 2   | 7   | 1  | 5   | 7   | 1  | 0  | 1   | 9   | 1   | 1  | 0  | 0  | 0  | 10  | 89   | 1   | 3  | 10  | 3  | 5   | 3   | 56   | 8   | 239 | 4   | 21  | 21  | 4   | 18  |   |
| ME_Horvath (344)          | 344  | 14   | 27   | 49   | 344  | 0  | 2   | 1   | 3   | 3   | 2   | 4   | 2  | 5   | 14  | 2  | 0  | 4   | 5   | 3   | 0  | 2  | 1  | 0  | 10  | 38   | 1   | 5  | 39  | 15 | 11  | 10  | 33   | 344 | 8   | 13  | 5   | 58  | 23  | 70  |   |
| ME_Heyn (1445)            | 1445 | 119  | 104  | 206  | 1445 | 8  | 10  | 7   | 20  | 29  | 30  | 30  | 10 | 17  | 42  | 8  | 2  | 9   | 37  | 12  | 1  | 5  | 1  | 7  | 45  | 143  | 18  | 6  | 39  | 8  | 15  | 11  | 1445 | 33  | 56  | 11  | 69  | 65  | 16  | 79  |   |
| ME_Hannum (117)           | 117  | 6    | 5    | 14   | 117  | 0  | 2   | 0   | 2   | 1   | 0   | 0   | 1  | 2   | 2   | 0  | 1  | 0   | 1   | 1   | 0  | 1  | 0  | 0  | 3   | 11   | 2   | 12 | 7   | 5  | 32  | 117 | 11   | 10  | 3   | 2   | 4   | 14  | 8   | 16  |   |
| ME_Florath (122)          | 122  | 8    | 13   | 7    | 122  | 0  | 3   | 0   | 2   | 1   | 0   | 2   | 0  | 0   | 6   | 1  | 1  | 2   | 3   | 3   | 0  | 1  | 0  | 0  | 4   | 3    | 0   | 17 | 17  | 9  | 122 | 32  | 15   | 11  | 5   | 5   | 4   | 21  | 9   | 21  |   |
| ME_Bocklandt (81)         | 81   | 3    | 9    | 12   | 81   | 0  | 0   | 1   | 1   | 1   | 1   | 1   | 0  | 0   | 6   | 0  | 0  | 0   | 3   | 1   | 0  | 0  | 0  | 1  | 2   | 9    | 0   | 5  | 38  | 81 | 9   | 5   | 8    | 15  | 3   | 14  | 2   | 41  | 19  | 54  |   |
| ME_Bell (444)             | 444  | 28   | 41   | 35   | 444  | 2  | 3   | 3   | 8   | 6   | 5   | 9   | 0  | 8   | 21  | 3  | 0  | 3   | 14  | 6   | 0  | 0  | 0  | 0  | 16  | 21   | 2   | 7  | 444 | 38 | 17  | 7   | 39   | 39  | 10  | 73  | 18  | 90  | 27  | 185 |   |
| ME_Bacalani (44)          | 44   | 5    | 9    | 7    | 44   | 1  | 0   | 0   | 2   | 1   | 0   | 1   | 0  | 1   | 6   | 0  | 1  | 1   | 1   | 1   | 0  | 2  | 0  | 1  | 2   | 4    | 2   | 44 | 7   | 5  | 17  | 12  | 6    | 5   | 3   | 4   | 1   | 14  | 7   | 14  |   |
| EX_Sood (153)             | 153  | 14   | 12   | 153  | 36   | 1  | 1   | 1   | 3   | 3   | 5   | 3   | 0  | 3   | 6   | 2  | 0  | 2   | 5   | 4   | 0  | 0  | 1  | 2  | 5   | 11   | 153 | 2  | 2   | 0  | 0   | 2   | 18   | 1   | 1   | 0   | 7   | 5   | 0   | 4   |   |
| EX_Peters (1497)          | 1497 | 141  | 109  | 1497 | 366  | 21 | 27  | 10  | 26  | 24  | 17  | 48  | 8  | 23  | 32  | 7  | 2  | 8   | 46  | 16  | 4  | 9  | 1  | 6  | 51  | 1497 | 11  | 4  | 21  | 9  | 3   | 11  | 143  | 38  | 89  | 5   | 43  | 67  | 10  | 53  |   |
| EX_Mercken (485)          | 485  | 31   | 63   | 485  | 119  | 5  | 2   | 2   | 9   | 9   | 2   | 10  | 0  | 4   | 44  | 5  | 0  | 8   | 6   | 22  | 1  | 2  | 1  | 4  | 485 | 51   | 5   | 2  | 16  | 2  | 4   | 3   | 45   | 10  | 10  | 4   | 7   | 21  | 2   | 21  |   |
| EX_Magalhaes (73)         | 73   | 9    | 6    | 73   | 14   | 0  | 1   | 2   | 1   | 1   | 0   | 5   | 0  | 0   | 3   | 0  | 1  | 0   | 3   | 2   | 0  | 0  | 0  | 73 | 4   | 6    | 2   | 1  | 0   | 1  | 0   | 0   | 7    | 0   | 0   | 0   | 2   | 2   | 1   | 4   |   |
| ARD_HPO_Stroke (34)       | 34   | 5    | 34   | 3    | 4    | 0  | 0   | 0   | 1   | 0   | 0   | 4   | 0  | 4   | 21  | 3  | 2  | 2   | 5   | 15  | 0  | 1  | 34 | 0  | 1   | 1    | 1   | 0  | 0   | 0  | 0   | 0   | 0    | 1   | 1   | 0   | 0   | 1   | 1   | 0   | 1 |
| ARD_HPO_Neuro (74)        | 74   | 24   | 74   | 11   | 13   | 1  | 4   | 2   | 11  | 2   | 5   | 3   | 0  | 3   | 9   | 1  | 16 | 1   | 5   | 5   | 0  | 74 | 1  | 0  | 2   | 9    | 0   | 2  | 0   | 0  | 1   | 1   | 5    | 2   | 0   | 0   | 1   | 4   | 0   | 4   |   |
| ARD_HPO_Diabetes (28)     | 28   | 6    | 28   | 5    | 5    | 0  | 0   | 1   | 2   | 2   | 0   | 1   | 1  | 3   | 2   | 14 | 1  | 0   | 6   | 2   | 28 | 0  | 0  | 0  | 1   | 4    | 0   | 0  | 0   | 0  | 0   | 0   | 1    | 0   | 1   | 1   | 1   | 1   | 1   | 0   | 1 |
| ARD_HPO_Cardio (164)      | 164  | 25   | 164  | 39   | 32   | 1  | 2   | 6   | 5   | 9   | 3   | 13  | 2  | 12  | 83  | 7  | 4  | 18  | 26  | 164 | 2  | 5  | 15 | 2  | 22  | 16   | 4   | 1  | 6   | 1  | 3   | 1   | 12   | 3   | 1   | 2   | 3   | 7   | 1   | 10  |   |
| ARD_HPO_Cancer (427)      | 427  | 87   | 427  | 56   | 90   | 1  | 2   | 18  | 36  | 21  | 9   | 40  | 9  | 104 | 34  | 4  | 5  | 15  | 427 | 26  | 6  | 5  | 5  | 3  | 6   | 46   | 5   | 1  | 14  | 3  | 3   | 1   | 37   | 5   | 9   | 9   | 9   | 14  | 2   | 20  |   |
| ARD_HPO_Ageing (126)      | 126  | 13   | 126  | 16   | 23   | 0  | 2   | 4   | 4   | 4   | 2   | 6   | 1  | 5   | 20  | 2  | 0  | 126 | 15  | 18  | 0  | 1  | 2  | 0  | 8   | 8    | 2   | 1  | 3   | 0  | 2   | 0   | 9    | 4   | 1   | 0   | 1   | 3   | 0   | 5   |   |
| ARD_HGMD_Neuro (34)       | 34   | 10   | 34   | 3    | 6    | 1  | 0   | 2   | 6   | 0   | 1   | 2   | 0  | 4   | 5   | 0  | 34 | 0   | 5   | 4   | 1  | 16 | 2  | 1  | 0   | 2    | 0   | 1  | 0   | 0  | 1   | 1   | 2    | 0   | 0   | 0   | 0   | 3   | 0   | 1   |   |
| ARD_HGMD_Diabetes (83)    | 83   | 20   | 83   | 13   | 22   | 2  | 1   | 8   | 3   | 11  | 2   | 8   | 3  | 5   | 10  | 83 | 0  | 2   | 4   | 7   | 14 | 1  | 3  | 0  | 5   | 7    | 2   | 0  | 3   | 0  | 1   | 0   | 8    | 2   | 1   | 3   | 2   | 2   | 0   | 4   |   |
| ARD_HGMD_Cardio (402)     | 402  | 41   | 402  | 79   | 112  | 2  | 5   | 6   | 9   | 9   | 5   | 17  | 2  | 16  | 402 | 10 | 5  | 20  | 34  | 83  | 2  | 9  | 21 | 3  | 44  | 32   | 6   | 6  | 21  | 6  | 6   | 2   | 42   | 14  | 7   | 8   | 14  | 23  | 5   | 30  |   |
| ARD_HGMD_Cancer (226)     | 226  | 58   | 226  | 28   | 54   | 0  | 3   | 16  | 24  | 15  | 5   | 23  | 2  | 226 | 16  | 5  | 4  | 5   | 104 | 12  | 3  | 3  | 4  | 0  | 4   | 23   | 3   | 1  | 8   | 0  | 0   | 2   | 17   | 5   | 5   | 4   | 6   | 13  | 1   | 15  |   |
| AGE_mTOR (60)             | 60   | 60   | 13   | 8    | 16   | 0  | 0   | 6   | 11  | 26  | 0   | 13  | 60 | 2   | 2   | 3  | 0  | 1   | 9   | 2   | 1  | 0  | 0  | 0  | 0   | 8    | 0   | 0  | 0   | 0  | 0   | 1   | 10   | 2   | 1   | 0   | 2   | 2   | 0   | 3   |   |
| AGE_Senescence (342)      | 342  | 342  | 75   | 61   | 65   | 7  | 3   | 38  | 43  | 30  | 7   | 342 | 13 | 23  | 17  | 8  | 2  | 6   | 40  | 13  | 1  | 3  | 4  | 5  | 10  | 48   | 3   | 1  | 9   | 1  | 2   | 0   | 30   | 4   | 7   | 5   | 12  | 11  | 2   | 11  |   |
| AGE_Longevity_HT (144)    | 144  | 144  | 19   | 23   | 44   | 0  | 1   | 5   | 5   | 8   | 144 | 7   | 0  | 5   | 5   | 2  | 1  | 2   | 9   | 3   | 0  | 5  | 0  | 0  | 2   | 17   | 5   | 0  | 5   | 1  | 0   | 0   | 30   | 2   | 2   | 1   | 5   | 4   | 1   | 3   |   |
| AGE_Longevity (195)       | 195  | 195  | 46   | 36   | 48   | 4  | 1   | 27  | 28  | 195 | 8   | 30  | 26 | 15  | 9   | 11 | 0  | 4   | 21  | 9   | 2  | 2  | 0  | 1  | 9   | 24   | 3   | 1  | 6   | 1  | 1   | 1   | 29   | 3   | 7   | 3   | 4   | 7   | 0   | 8   |   |
| AGE_GenAge_Indirect (198) | 198  | 198  | 61   | 35   | 43   | 6  | 1   | 0   | 198 | 28  | 5   | 43  | 11 | 24  | 9   | 3  | 6  | 4   | 36  | 5   | 2  | 11 | 1  | 1  | 9   | 26   | 3   | 2  | 8   | 1  | 2   | 2   | 20   | 3   | 2   | 3   | 3   | 10  | 1   | 13  |   |
| AGE_GenAge (100)          | 100  | 100  | 34   | 13   | 17   | 1  | 2   | 100 | 0   | 27  | 5   | 38  | 6  | 16  | 6   | 8  | 2  | 4   | 18  | 6   | 1  | 2  | 0  | 2  | 2   | 10   | 1   | 0  | 3   | 1  | 0   | 0   | 7    | 1   | 1   | 2   | 3   | 5   | 2   | 7   |   |
| AGE_Co_Chaperones (244)   | 244  | 244  | 15   | 30   | 27   | 0  | 244 | 2   | 1   | 1   | 1   | 3   | 0  | 3   | 5   | 1  | 0  | 2   | 2   | 2   | 0  | 4  | 0  | 1  | 2   | 27   | 1   | 0  | 3   | 0  | 3   | 2   | 10   | 2   | 1   | 0   | 6   | 4   | 0   | 5   |   |
| AGE_Chaperones (88)       | 88   | 88   | 8    | 27   | 16   | 88 | 0   | 1   | 6   | 4   | 0   | 7   | 0  | 0   | 2   | 2  | 1  | 0   | 1   | 1   | 0  | 1  | 0  | 0  | 5   | 21   | 1   | 1  | 2   | 0  | 0   | 0   | 8    | 0   | 0   | 1   | 0   | 3   | 1   | 5   |   |
| ME (3498)                 | 3498 | 230  | 274  | 510  | 3498 | 16 | 27  | 17  | 43  | 48  | 44  | 65  | 16 | 54  | 112 | 22 | 6  | 23  | 90  | 32  | 5  | 13 | 4  | 14 | 119 | 366  | 36  | 44 | 444 | 81 | 122 | 117 | 1445 | 344 | 239 | 138 | 436 | 591 | 105 | 679 |   |
| EX (2130)                 | 2130 | 184  | 180  | 2130 | 510  | 27 | 30  | 13  | 35  | 36  | 23  | 61  | 8  | 28  | 79  | 13 | 3  | 16  | 56  | 39  | 5  | 11 | 3  | 73 | 485 | 1497 | 153 | 7  | 35  | 12 | 7   | 14  | 206  | 49  | 96  | 9   | 57  | 90  | 13  | 80  |   |
| ARD (1207)                | 1207 | 191  | 1207 | 180  | 274  | 8  | 15  | 34  | 61  | 46  | 19  | 75  | 13 | 226 | 402 | 83 | 34 | 126 | 427 | 164 | 28 | 74 | 34 | 6  | 63  | 109  | 12  | 9  | 41  | 9  | 13  | 5   | 104  | 27  | 18  | 19  | 31  | 50  | 7   | 73  |   |
| AGE (1154)                | 1154 | 1154 | 191  | 184  | 230  | 88 | 244 | 100 | 198 | 195 | 144 | 342 | 60 | 58  | 41  | 20 | 10 | 13  | 87  | 25  | 6  | 24 | 5  | 9  | 31  | 141  | 14  | 5  | 28  | 3  | 8   | 6   | 119  | 14  | 17  | 9   | 30  | 37  | 5   | 42  |   |
| ALL PANELS (6600)         | 6600 | 1154 | 1207 | 2130 | 3498 | 88 | 244 | 100 | 198 | 195 | 144 | 342 | 60 | 226 | 402 | 83 | 34 | 126 | 427 | 164 | 28 | 74 | 34 | 73 | 485 | 1497 | 153 | 44 | 444 | 81 | 122 | 117 | 1445 | 344 | 239 | 138 | 436 | 591 | 105 | 679 |   |

Fraction of overlapping genes

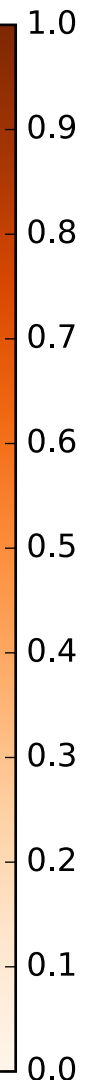

Supplement: 10522_2017_9741_MOESM1_ESM.pdf [file 10522_2017_9741_MOESM1_ESM.pdf]
