# Supplementary material for: A network-based meta-analysis for characterizing the genetic landscape of human aging
Source: PubMed Central journal article supplement (PMC5765210; doi:10.1007/s10522-017-9741-5), 2017-12-21

# Network degree bioplex, mentha, string\_0.9 (N=17451)

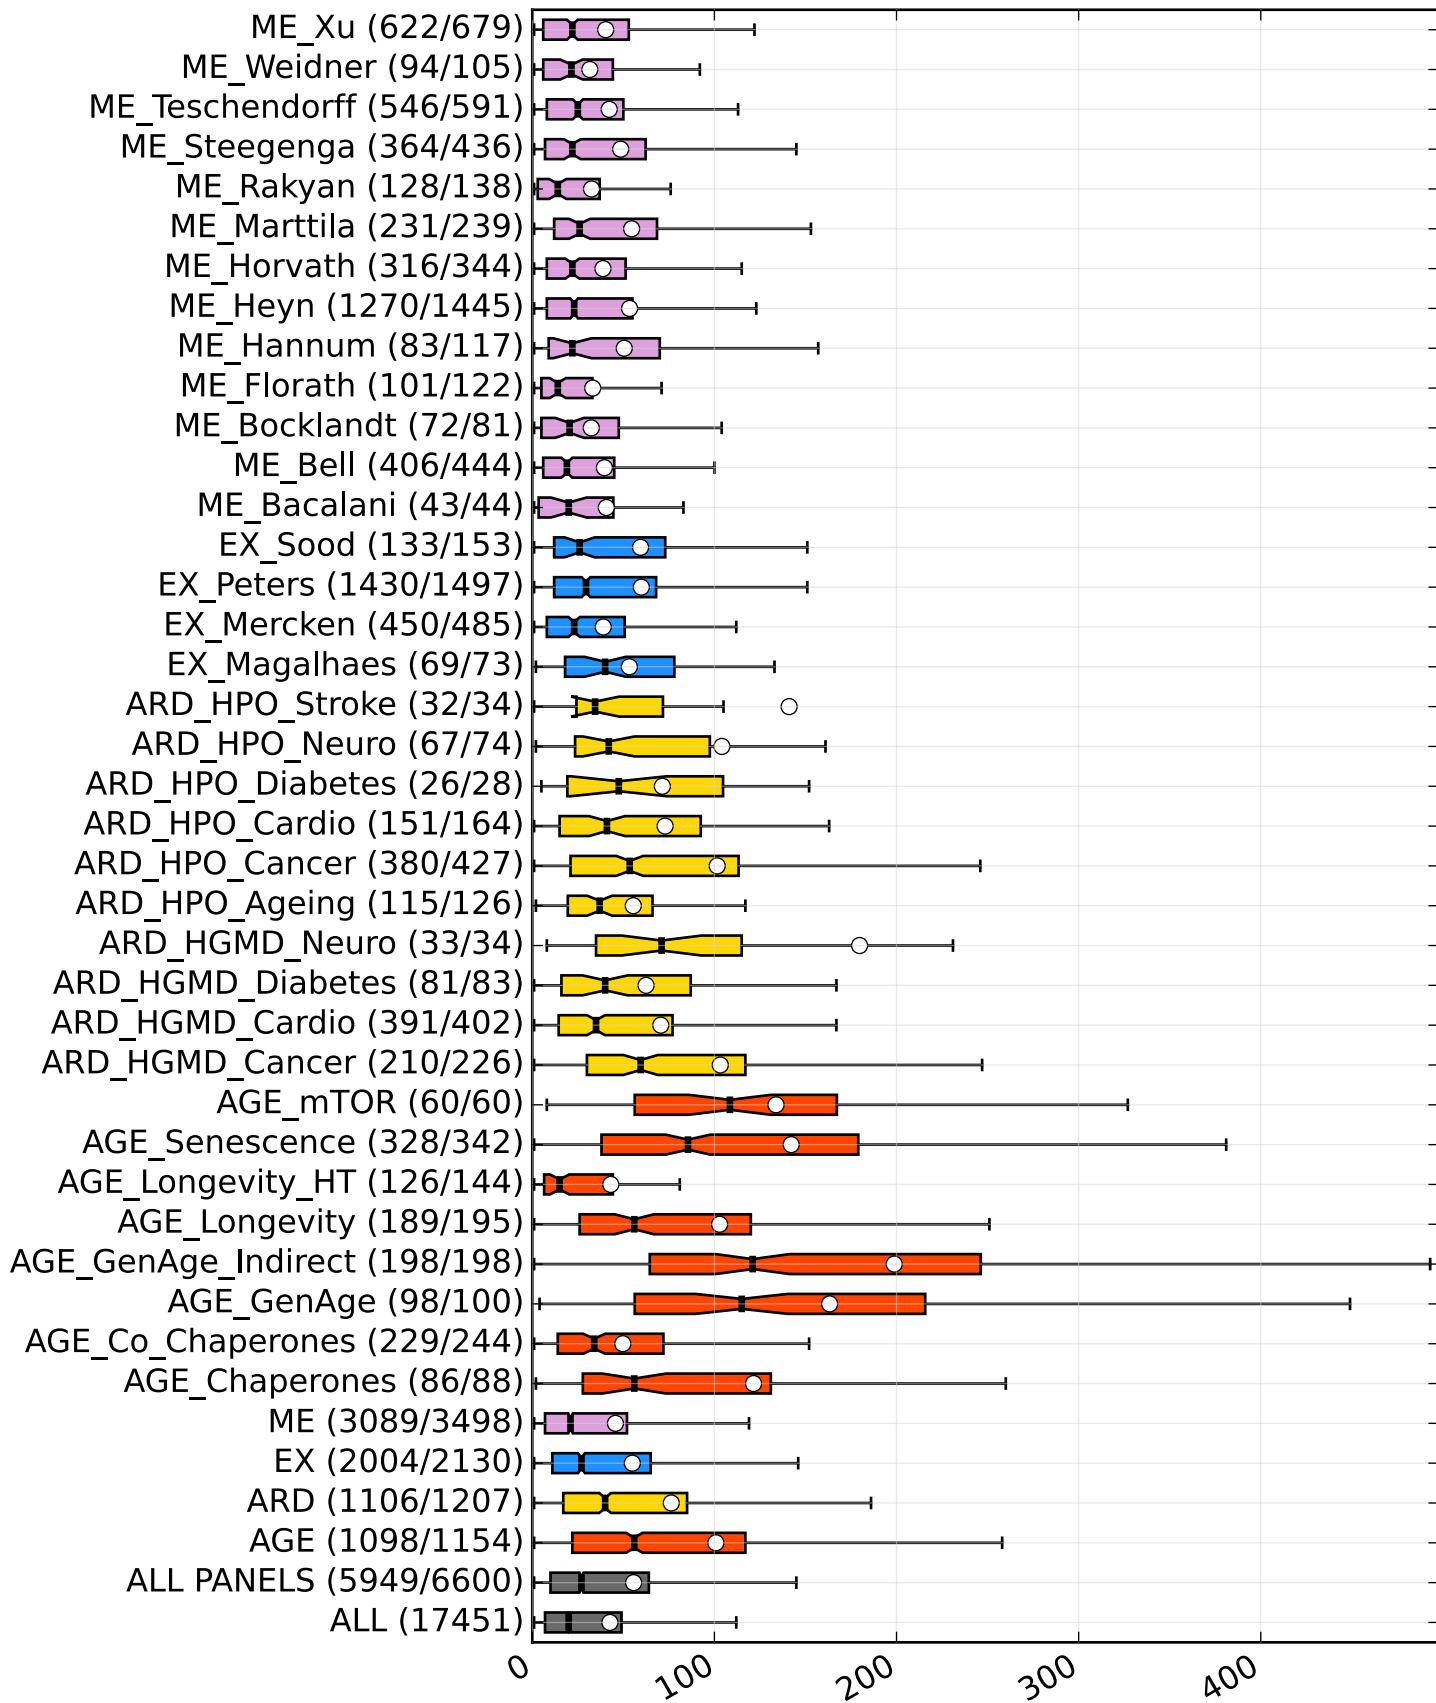

Supplement: 10522_2017_9741_MOESM2_ESM.pdf [file 10522_2017_9741_MOESM2_ESM.pdf]
